# Supplementary material
Source: HighWire-hosted journal article supplement (https://jnis.bmj.com/content/15/2/102)
Supplement: inline-supplementary-material-1 [file inline-supplementary-material-1.pdf]

**Table 1.** Modified Cekirge-Saatci Classification (mCSC)

| Class          | Description                                      | Commentaries                                                                                                                             |
|----------------|--------------------------------------------------|------------------------------------------------------------------------------------------------------------------------------------------|
| <b>Class 1</b> | <b>Complete aneurysm occlusion</b>               | In aneurysms with no incorporated branches                                                                                               |
| 1A             | with full patency of the integrated branch       | Subclassification 1A-C is reserved for aneurysms with an incorporated branch                                                             |
| 1B             | with the branch reduced in caliber               |                                                                                                                                          |
| 1C             | with no anterograde filling of the branch        |                                                                                                                                          |
| <b>Class 2</b> | <b>Residual neck filling</b>                     |                                                                                                                                          |
| <b>Class 3</b> | <b>Residual aneurysm filling</b>                 | Residual aneurysm, whether in the presence of an incorporated branch or not                                                              |
| 3A             | with stable residuum                             | Residual aneurysm with <b>no incorporated branch</b> showing <b>stable or progressive</b> size reduction on follow-up(s)                 |
| 3C             | with documented growth                           | Aneurysm showing <b>growth</b> on follow-up, regardless of the presence of a side branch                                                 |
| <b>Class 4</b> | <b>Aneurysm filling (Immediate results)</b>      | Class 4 is reserved for immediate postoperative results.                                                                                 |
| 4A             | with contrast stagnation within the aneurysm sac |                                                                                                                                          |
| 4B             | without contrast stagnation                      |                                                                                                                                          |
| <b>Class 5</b> | <b>Residual aneurysm filling with remodeling</b> | Aneurysm with <b>residual filling at the integrated branch site</b> demonstrating <b>stable</b> , decreased size on follow-up(s).        |
| 5A             | Progressive remodeling                           | Aneurysm with <b>residual filling at the integrated branch site</b> demonstrating a <b>progressive</b> decrease in size on follow-up(s). |

For satisfactory radiological classification of aneurysm remodeling, two imaging controls are required (at least six months apart) and extending beyond 1-year of the index procedure. According to the original definition, there is an exceptional situation in which class 5 can be adjudicated at the first imaging control. It pertains to cases in which the branch is seen patent but with a different contrast course than originally expected within the aneurysm sac, in the absence of apparent aneurysm filling.
